# Supplementary material for: A vector platform for the rapid and efficient engineering of stable complex transgenes
Source: PubMed Central journal article supplement (PMC5046065; doi:10.1038/srep34365), 2016-10-03
Supplement: srep34365-s1.pdf [file srep34365-s1.pdf]

# A vector platform for the rapid and efficient engineering of stable complex transgenes

Carsten Jäckel<sup>1</sup>, Melanie Schmitt-Nogueira<sup>1</sup>, Nadja Ehni<sup>1</sup>, Christiane Kraus<sup>1</sup>, Julius Ranke<sup>1</sup>, Maike Dohmann<sup>1</sup>, Elfriede Noessner<sup>2</sup> and Peter J. Nelson<sup>1\*</sup>

<sup>1</sup>Medizinische Klinik und Poliklinik IV, Klinikum Innenstadt, Ludwig-Maximilians-University Munich, Clinical Biochemistry Group, Munich, Germany

<sup>2</sup>Core Facility Immunanalytik, Helmholtz Zentrum, Großhadern, Germany

**Corresponding author:** \*Peter J. Nelson, Ph.D. Medizinische Klinik und Poliklinik IV, Klinikum Innenstadt, Ludwig-Maximilians-University Munich, Nephrology Center, Clinical Biochemistry Group, Schillerstrasse 42, 80336, Munich, Germany

Supplemental Figures:

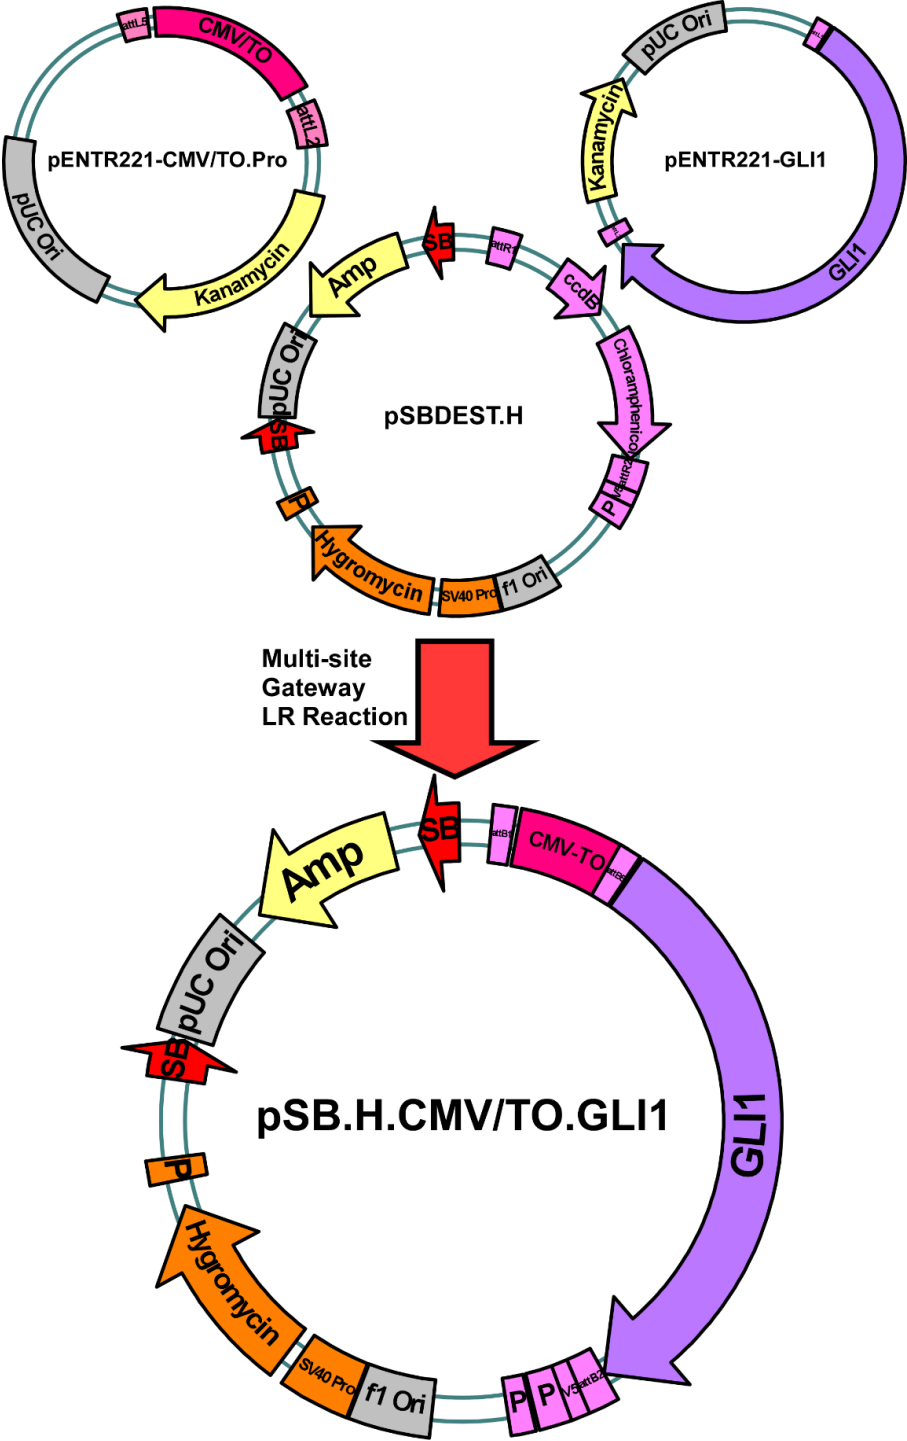

**Supplemental Figure S1. Sample MultiSite Gateway reaction.** MultiSite Gateway reactions can be used to generate complex, SB-compatible vectors in a rapid, site-specific process. Here, an inducible expression vector for GLI1 is generated from two Entry clones in the pSBDEST.H vector.

**Supplemental Sequences:**

**Minimal CMV Promoter:**

CGAGATCTAGACTCTAGAGGGTATATAATGGAAGCT

**Minimal TK Promoter:**

TTCGCATATTAAGGTGACGCGTGTGGCCTCGAACACCGAGCGACCCTGCAGCGAC  
CCGCT

TAA

**AP1 Binding element (6x multimer):**

TGACTCA, Linker Sequence: TCAAGCA

**GLI binding element (8x multimer):**

GACCACCCA

**TEAD binding element (8x multimer):**

ACATTCC, varying linker sequences

**HIF binding element (3x multimer)**

GTGCAGGACGTGACAAA

**LXR binding element (3x multimer)**

TGACCAGCAGTAACC

**NFAT5 binding element (dimer)**

CAGCGGTAATTTTCCACCA

**TCF/LEF binding element (12x multimer)**

ATCAAAG

**SMAD binding element (5x multimer)**

AGCCAGACAGT

**RaPM element (3x multimer)**

CTATTTTGGAAACTCCCCTTAGGGGATGCCCTC, Linker sequence:  
AACTGCTCGAG
